# Supplementary material for: Organic field-effect transistors processed by an environmentally friendly non-halogenated solvent blend
Source: Royal Society of Chemistry journal article supplement (doi:10.1039/c7tc04823h), 2017-12-18
Supplement: c7tc04823h1.pdf [file c7tc04823h1.pdf]

**Supplementary Information for**

**Organic Field-Effect Transistors Processed by  
Environmentally Friendly Non-Halogenated Solvent Blend**

Opoku Henry, Benjamin Nketia-Yawson, Eun Sol Shin, Yong-Young Noh\*

Department of Energy and Materials Engineering, Dongguk University, 30 Pildong-ro, 1 gil,  
Jung-gu, Seoul 04620, South Korea.

\*E-mail: yynoh@dongguk.edu

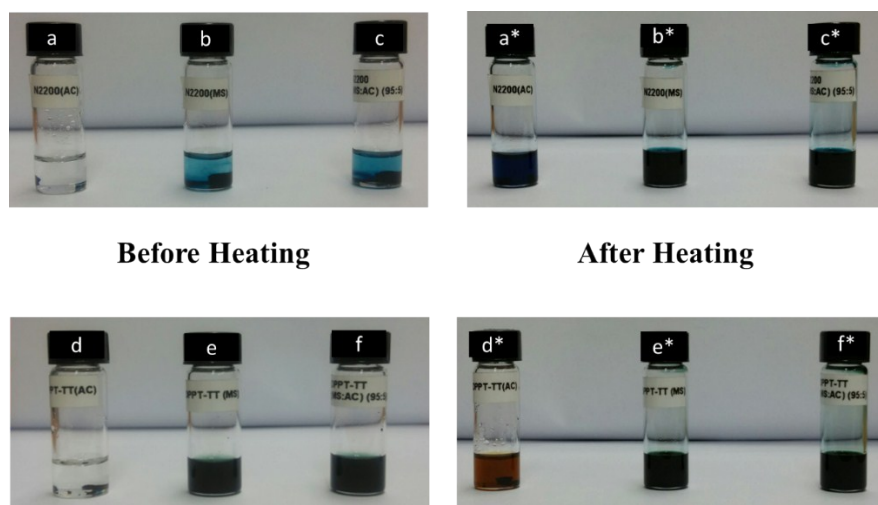

**Figure S1:** P(NDI2OD-T2) and DPPT-TT Polymers in (a, d) acetophenone, (b, c) mesitylene, and (c, f) M:A (95:5 vol%) solvents, before and after Heating at 80°C for 24 h.

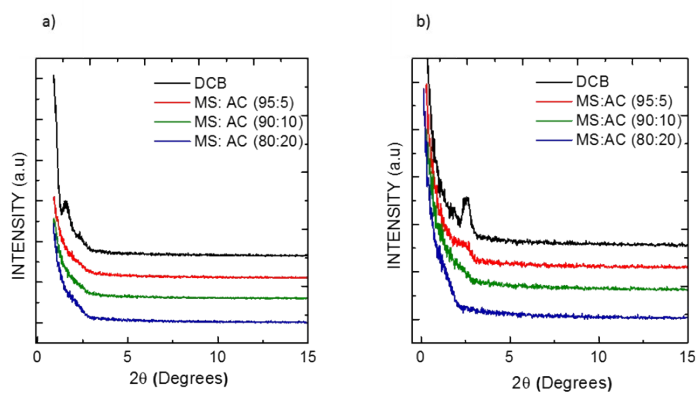

**Figure S2:** X-Ray diffraction patterns for (a) P(NDI2OD-T2) and (b) DPPT-TT in O-DCB and non-halogenated solvent blends.

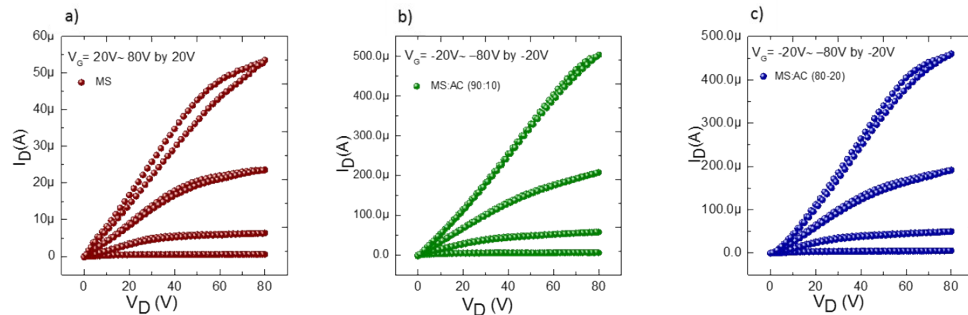

**Figure S3:** Output characteristics of P(NDI2OD-T2) OFETs in (a) MS (b) MS:AC (95:5 vol%) and (c) MS:AC (90:10 vol%) solvent blends.

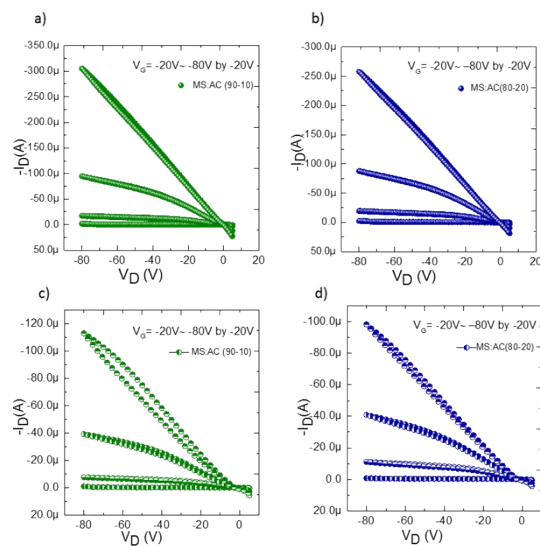

**Figure S4:** Output characteristics of (a, b) DPPT-TT and (c, d) IDT-BT OFETs cast from MS:AC (90:10 vol%) and MS:AC (80:20 vol%) solvent blends.
